# Supplementary material for: Compaction and self-association of megabase-sized chromatin are induced by anionic protein crowding
Source: Royal Society of Chemistry journal article supplement (doi:10.1039/d0sm00162g), 2020-01-01
Supplement: d0sm00162g1.pdf [file d0sm00162g1.pdf]

# Supporting Information for

## Compaction and Self-Association of Megabase-Sized Chromatin is Induced by Anionic Protein Crowding

Anatoly Zinchenko,<sup>1\*</sup> Qinming Chen,<sup>2</sup> Nikolay V. Berezhnoy,<sup>2,§</sup> Sai Wang,<sup>2,#</sup> Lars

Nordenskiöld<sup>2,\*</sup>

<sup>1</sup> Graduate School of Environmental Studies, Nagoya University, Furo-cho, Chikusa-ku,  
Nagoya, 464-8601, Japan

<sup>2</sup> School of Biological Sciences, Nanyang Technological University, 60 Nanyang Drive,  
637551, Singapore

## 1. Partitioning of BSA crowders inside and outside chromatin self-associates

The fluorescence intensities of Texas Red labeled BSA inside and outside the chromatin aggregates were similar indicating no discernible excess accumulation of BSA in self-assembled particles (**Figure S1, B**). The self-assembled aggregates do not exhibit the interfacial droplet-like shape (**Figure S1, C**) and behavior (**Figure S2**) characteristic for liquid-liquid phase separation (LLPS).

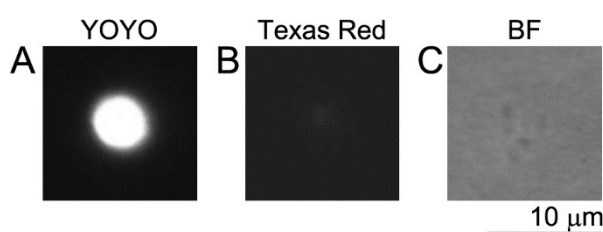

**Figure S1. A-B.** Fluorescent images of an associate formed in a solution of chromatin at 100% HO loading in a bulk solution of TE buffer containing 10% of BSA, 0.1 M of NaCl, YOYO dye (8 nM), and Texas Red labeled BSA (25 μg/L) observed through B-2A filter (A) for DNA-bound YOYO dye and G-2A filter (B) for Texas Red labeled BSA under the same irradiation conditions. **C.** Bright field image of the chromatin associate.

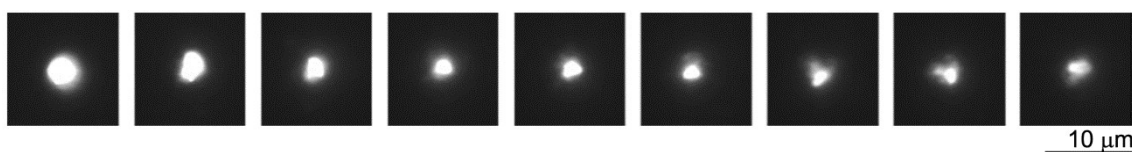

**Figure S2.** Fluorescent images showing decomposition of an associate of chromatin at 100% HO loading under strong light irradiation ( $\lambda = 485-585$  nm) observed through B-2A filter. The time interval between snapshots is 5-10 s. The solution composition the same as for **Figure S1**.
